# Supplementary material for: Axial–equatorial isomerism and semiexperimental equilibrium structures of fluorocyclohexane
Source: Royal Society of Chemistry journal article supplement (doi:10.1039/c7cp06135h), 2017-01-01
Supplement: c7cp06135h1.pdf [file c7cp06135h1.pdf]

# Axial-Equatorial Isomerism and Semiexperimental Equilibrium Structures of Fluorocyclohexane

## ELECTRONIC SUPPORTING INFORMATION

Marcos Juanes,<sup>a</sup> Natalja Vogt,<sup>b,c</sup> Jean Demaison,<sup>b</sup> Iker León,<sup>a</sup>  
Alberto Lesarri,<sup>a</sup> Heinz Dieter Rudolph<sup>b</sup>

---

<sup>a</sup>Departamento de Química Física y Química Inorgánica, Facultad de Ciencias, Universidad de Valladolid  
47011 Valladolid (Spain)

<sup>b</sup>Section of Chemical Information Systems, University of Ulm, Albert-Einstein-Allee 47, 89081 Ulm (Germany)

<sup>c</sup> Department of Chemistry, Lomonosov Moscow State University, 119991 Moscow (Russia)

**Table S1.** Experimental rotational transitions (obs) for the equatorial parent species of fluorocyclohexane, along with observed minus calculated values (o-c) and transition uncertainties (unc, all values in MHz).

| $J'$ | $K_{-l}'$ | $K_{+l}'$ | $J''$ | $K_{-l}''$ | $K_{+l}''$ | obs        | o-c     | unc   |
|------|-----------|-----------|-------|------------|------------|------------|---------|-------|
| 2    | 1         | 2         | 1     | 1          | 1          | 6963.61910 | 0.0000  | 0.005 |
| 2    | 0         | 2         | 1     | 0          | 1          | 7451.64790 | 0.0016  | 0.005 |
| 2    | 1         | 1         | 1     | 1          | 0          | 8157.97270 | 0.0044  | 0.005 |
| 2    | 2         | 1         | 2     | 0          | 2          | 9801.80210 | 0.0003  | 0.005 |
| 3    | 1         | 3         | 2     | 1          | 2          | 10382.4615 | 0.0005  | 0.005 |
| 3    | 0         | 3         | 2     | 0          | 2          | 10926.7235 | -0.0090 | 0.005 |
| 3    | 1         | 2         | 2     | 1          | 1          | 12161.2644 | 0.0020  | 0.005 |
| 3    | 2         | 2         | 2     | 2          | 1          | 11341.1840 | 0.0036  | 0.005 |
| 3    | 2         | 1         | 2     | 2          | 0          | 11755.6368 | 0.0016  | 0.005 |
| 4    | 0         | 4         | 3     | 0          | 3          | 14196.6962 | -0.0007 | 0.005 |
| 4    | 1         | 4         | 3     | 1          | 3          | 13741.8724 | 0.0008  | 0.005 |
| 4    | 1         | 3         | 3     | 1          | 2          | 16055.9745 | -0.0047 | 0.005 |
| 4    | 2         | 3         | 3     | 2          | 2          | 15035.9686 | 0.0012  | 0.005 |
| 4    | 2         | 2         | 3     | 2          | 1          | 15959.4600 | -0.1587 | 0.250 |
| 4    | 3         | 2         | 3     | 3          | 1          | 15306.9033 | -0.0010 | 0.005 |
| 4    | 3         | 1         | 3     | 3          | 0          | 15381.4936 | -0.0014 | 0.005 |
| 5    | 0         | 5         | 4     | 0          | 4          | 17346.6561 | 0.0009  | 0.005 |
| 5    | 1         | 5         | 4     | 1          | 4          | 17043.8351 | 0.0021  | 0.005 |
| 5    | 1         | 4         | 4     | 1          | 3          | 19781.4400 | -0.0247 | 0.250 |
| 5    | 2         | 4         | 4     | 2          | 3          | 18660.0300 | -0.0625 | 0.250 |
| 5    | 2         | 3         | 4     | 2          | 2          | 20205.7000 | -0.0253 | 0.250 |
| 5    | 3         | 3         | 4     | 3          | 2          | 19163.2800 | 0.0126  | 0.250 |
| 5    | 3         | 2         | 4     | 3          | 1          | 19411.2400 | -0.1618 | 0.250 |
| 6    | 0         | 6         | 5     | 0          | 5          | 20470.8300 | -0.0369 | 0.250 |
| 6    | 1         | 6         | 5     | 1          | 5          | 20299.3900 | 0.0529  | 0.250 |
| 6    | 1         | 5         | 5     | 1          | 4          | 23280.9200 | -0.0573 | 0.250 |
| 6    | 2         | 5         | 5     | 2          | 4          | 22202.1600 | -0.0979 | 0.250 |
| 6    | 2         | 4         | 5     | 2          | 3          | 24371.3900 | 0.0198  | 0.250 |
| 6    | 3         | 4         | 5     | 3          | 3          | 22997.1000 | 0.0603  | 0.250 |
| 6    | 3         | 3         | 5     | 3          | 2          | 23597.2800 | -0.1118 | 0.250 |

**Table S2.** Experimental rotational transitions (obs) for the equatorial  $^{13}\text{C}(I)$  species of fluorocyclohexane, along with observed minus calculated values (o-c) and transition uncertainties (unc, all values in MHz).

| $J'$ | $K_{-l}'$ | $K_{+l}'$ | $J''$ | $K_{-l}''$ | $K_{+l}''$ | obs        | o-c     | unc   |
|------|-----------|-----------|-------|------------|------------|------------|---------|-------|
| 3    | 1         | 3         | 2     | 1          | 2          | 10350.7784 | -0.0005 | 0.005 |
| 3    | 0         | 3         | 2     | 0          | 2          | 10893.4825 | 0.0000  | 0.005 |
| 4    | 1         | 4         | 3     | 1          | 3          | 13701.1600 | -0.0012 | 0.005 |
| 3    | 1         | 2         | 2     | 1          | 1          | 12115.3837 | 0.0028  | 0.005 |
| 4    | 0         | 4         | 3     | 0          | 3          | 14156.9407 | 0.0000  | 0.005 |
| 4    | 2         | 3         | 3     | 2          | 2          | 14984.1287 | 0.0013  | 0.005 |
| 4    | 1         | 3         | 3     | 1          | 2          | 15997.8232 | -0.0031 | 0.005 |
| 5    | 0         | 5         | 4     | 0          | 4          | 17299.9917 | 0.0009  | 0.005 |

**Table S3.** Experimental rotational transitions (obs) for the equatorial  $^{13}\text{C}(2)$  species of fluorocyclohexane, along with observed minus calculated values (o-c) and transition uncertainties (unc, all values in MHz).

| $J'$ | $K_{-l}'$ | $K_{+l}'$ | $J''$ | $K_{-l}''$ | $K_{+l}''$ | obs        | o-c     | unc   |
|------|-----------|-----------|-------|------------|------------|------------|---------|-------|
| 2    | 1         | 2         | 1     | 1          | 1          | 6938.4006  | -0.0012 | 0.005 |
| 2    | 0         | 2         | 1     | 0          | 1          | 7428.5891  | 0.0003  | 0.005 |
| 2    | 1         | 1         | 1     | 1          | 0          | 8147.3254  | 0.0022  | 0.005 |
| 3    | 1         | 3         | 2     | 1          | 2          | 10341.8332 | -0.0012 | 0.005 |
| 4    | 1         | 4         | 3     | 1          | 3          | 13683.7583 | -0.0006 | 0.005 |
| 4    | 0         | 4         | 3     | 0          | 3          | 14126.5887 | -0.0007 | 0.005 |
| 4    | 2         | 3         | 3     | 2          | 2          | 14996.0330 | -0.0001 | 0.005 |
| 4    | 1         | 3         | 3     | 1          | 2          | 16020.8474 | -0.0034 | 0.005 |
| 3    | 0         | 3         | 2     | 0          | 2          | 10881.8398 | 0.0001  | 0.005 |
| 3    | 1         | 2         | 2     | 1          | 1          | 12141.4226 | 0.0029  | 0.005 |
| 5    | 1         | 5         | 4     | 1          | 4          | 16966.9643 | 0.0009  | 0.005 |
| 5    | 0         | 5         | 4     | 0          | 4          | 17255.2691 | 0.0014  | 0.005 |

**Table S4.** Experimental rotational transitions (obs) for the equatorial  $^{13}\text{C}(3)$  species of fluorocyclohexane, along with observed minus calculated values (o-c) and transition uncertainties (unc, all values in MHz).

| $J'$ | $K_{-l}'$ | $K_{+l}'$ | $J''$ | $K_{-l}''$ | $K_{+l}''$ | obs        | o-c     | unc   |
|------|-----------|-----------|-------|------------|------------|------------|---------|-------|
| 2    | 0         | 2         | 1     | 0          | 1          | 7389.7362  | 0.0014  | 0.005 |
| 3    | 1         | 3         | 2     | 1          | 2          | 10290.7526 | -0.0012 | 0.005 |
| 4    | 1         | 4         | 3     | 1          | 3          | 13618.0148 | -0.0012 | 0.005 |
| 4    | 0         | 4         | 3     | 0          | 3          | 14063.7235 | -0.0006 | 0.005 |
| 4    | 2         | 3         | 3     | 2          | 2          | 14914.7585 | 0.0009  | 0.005 |
| 4    | 1         | 3         | 3     | 1          | 2          | 15931.6926 | -0.0032 | 0.005 |
| 3    | 0         | 3         | 2     | 0          | 2          | 10829.6576 | 0.0000  | 0.005 |
| 3    | 1         | 2         | 2     | 1          | 1          | 12070.9080 | 0.0030  | 0.005 |
| 5    | 1         | 5         | 4     | 1          | 4          | 16887.4521 | 0.0002  | 0.005 |
| 5    | 0         | 5         | 4     | 0          | 4          | 17180.5736 | 0.0014  | 0.005 |

**Table S5.** Experimental rotational transitions (obs) for the equatorial  $^{13}\text{C}(4)$  species of fluorocyclohexane, along with observed minus calculated values (o-c) and transition uncertainties (unc, all values in MHz).

| $J'$ | $K_{-l}'$ | $K_{+l}'$ | $J''$ | $K_{-l}''$ | $K_{+l}''$ | obs        | o-c     | unc   |
|------|-----------|-----------|-------|------------|------------|------------|---------|-------|
| 3    | 1         | 3         | 2     | 1          | 2          | 10250.5207 | -0.0016 | 0.005 |
| 4    | 1         | 4         | 3     | 1          | 3          | 13571.7168 | -0.0009 | 0.005 |
| 4    | 0         | 4         | 3     | 0          | 3          | 14032.4870 | -0.0004 | 0.005 |
| 4    | 2         | 3         | 3     | 2          | 2          | 14826.3496 | 0.0016  | 0.005 |
| 4    | 1         | 3         | 3     | 1          | 2          | 15825.1094 | -0.0032 | 0.005 |
| 3    | 0         | 3         | 2     | 0          | 2          | 10790.7679 | 0.0000  | 0.005 |
| 3    | 1         | 2         | 2     | 1          | 1          | 11979.5191 | 0.0030  | 0.005 |
| 5    | 1         | 5         | 4     | 1          | 4          | 16837.7714 | 0.0003  | 0.005 |
| 5    | 0         | 5         | 4     | 0          | 4          | 17152.1730 | 0.0012  | 0.005 |

**Table S6.** Experimental rotational transitions (obs) for the axial parent species of fluorocyclohexane, along with observed minus calculated values (o-c) and transition uncertainties (unc, all values in MHz).

| $J'$ | $K_{-l}'$ | $K_{+l}'$ | $J''$ | $K_{-l}''$ | $K_{+l}''$ | obs        | o-c     | unc   |
|------|-----------|-----------|-------|------------|------------|------------|---------|-------|
| 1    | 1         | 0         | 0     | 0          | 0          | 6191.5922  | 0.0046  | 0.005 |
| 2    | 0         | 2         | 1     | 1          | 0          | 7398.1392  | -0.0027 | 0.005 |
| 2    | 1         | 2         | 1     | 1          | 1          | 8571.2592  | 0.0016  | 0.005 |
| 2    | 0         | 2         | 1     | 0          | 1          | 8980.2265  | -0.0003 | 0.005 |
| 2    | 1         | 1         | 1     | 1          | 0          | 9866.7399  | 0.0027  | 0.005 |
| 2    | 1         | 1         | 1     | 0          | 1          | 11448.8280 | 0.0059  | 0.005 |
| 3    | 1         | 3         | 2     | 1          | 2          | 12727.2443 | 0.0007  | 0.005 |
| 2    | 2         | 0         | 1     | 1          | 0          | 12908.5440 | -0.0032 | 0.005 |
| 3    | 0         | 3         | 2     | 0          | 2          | 13030.3699 | -0.0018 | 0.005 |
| 2    | 2         | 1         | 1     | 1          | 1          | 13317.5180 | -0.0006 | 0.005 |
| 3    | 2         | 2         | 2     | 2          | 1          | 13828.4839 | 0.0035  | 0.005 |
| 3    | 1         | 2         | 2     | 1          | 1          | 14610.7782 | -0.0089 | 0.005 |
| 3    | 2         | 1         | 2     | 2          | 0          | 14626.5756 | -0.0006 | 0.005 |
| 4    | 0         | 4         | 3     | 0          | 3          | 16937.3377 | 0.0013  | 0.005 |
| 4    | 1         | 4         | 3     | 1          | 3          | 16792.6407 | 0.0013  | 0.005 |
| 3    | 1         | 2         | 2     | 0          | 2          | 17079.36   | -0.0223 | 0.250 |
| 3    | 2         | 1         | 2     | 1          | 1          | 17668.32   | -0.0663 | 0.250 |
| 4    | 2         | 3         | 3     | 2          | 2          | 18245.85   | -0.0020 | 0.250 |
| 3    | 2         | 2         | 2     | 1          | 2          | 18574.71   | -0.0313 | 0.250 |
| 4    | 3         | 2         | 3     | 3          | 1          | 18787.74   | -0.0027 | 0.250 |
| 4    | 1         | 3         | 3     | 1          | 2          | 19062.96   | -0.0458 | 0.250 |
| 4    | 3         | 1         | 3     | 3          | 0          | 19108.31   | -0.0254 | 0.250 |
| 4    | 2         | 2         | 3     | 2          | 1          | 19734.16   | -0.0231 | 0.250 |
| 3    | 3         | 1         | 2     | 2          | 1          | 20249.13   | -0.0693 | 0.250 |
| 3    | 3         | 0         | 2     | 2          | 0          | 20070.09   | -0.0167 | 0.250 |
| 4    | 2         | 2         | 3     | 1          | 2          | 22791.77   | -0.0123 | 0.250 |
| 4    | 1         | 3         | 3     | 0          | 3          | 23111.99   | -0.0264 | 0.250 |
| 4    | 2         | 3         | 3     | 1          | 3          | 24093.32   | -0.0298 | 0.250 |
| 4    | 3         | 1         | 3     | 2          | 1          | 24551.86   | -0.0059 | 0.250 |
| 4    | 3         | 2         | 3     | 2          | 2          | 25208.39   | -0.0717 | 0.250 |
| 4    | 4         | 1         | 3     | 3          | 1          | 27307.97   | -0.0064 | 0.250 |
| 4    | 4         | 0         | 3     | 3          | 0          | 27260.52   | -0.0228 | 0.250 |

**Table S7.** Experimental rotational transitions (obs) for the axial  $^{13}\text{C}(I)$  species of fluorocyclohexane, along with observed minus calculated values (o-c) and transition uncertainties (unc, all values in MHz).

| $J'$ | $K_{-l}'$ | $K_{+l}'$ | $J''$ | $K_{-l}''$ | $K_{+l}''$ | obs        | o-c     | unc   |
|------|-----------|-----------|-------|------------|------------|------------|---------|-------|
| 2    | 0         | 2         | 1     | 0          | 1          | 8933.1159  | -0.0011 | 0.005 |
| 3    | 1         | 3         | 2     | 1          | 2          | 12663.3422 | -0.0008 | 0.005 |
| 3    | 0         | 3         | 2     | 0          | 2          | 12970.6585 | -0.0011 | 0.005 |
| 3    | 1         | 2         | 2     | 1          | 1          | 14520.2438 | 0.0005  | 0.005 |
| 4    | 1         | 4         | 3     | 1          | 3          | 16712.1335 | 0.0004  | 0.005 |
| 4    | 0         | 4         | 3     | 0          | 3          | 16862.0742 | 0.0011  | 0.005 |



**Table S8.** Experimental rotational transitions (obs) for the axial  $^{13}\text{C}(2)$  species of fluorocyclohexane, along with observed minus calculated values (o-c) and transition uncertainties (unc, all values in MHz).

| $J'$ | $K_{-l}'$ | $K_{+l}'$ | $J''$ | $K_{-l}''$ | $K_{+l}''$ | obs        | o-c     | unc   |
|------|-----------|-----------|-------|------------|------------|------------|---------|-------|
| 2    | 0         | 2         | 1     | 0          | 1          | 8930.6015  | 0.0020  | 0.005 |
| 3    | 1         | 3         | 2     | 1          | 2          | 12654.7293 | 0.0000  | 0.005 |
| 2    | 2         | 0         | 1     | 1          | 0          | 12760.1239 | 0.0000  | 0.005 |
| 3    | 0         | 3         | 2     | 0          | 2          | 12943.4929 | -0.0007 | 0.005 |
| 3    | 1         | 2         | 2     | 1          | 1          | 14552.5420 | -0.0005 | 0.005 |
| 4    | 1         | 4         | 3     | 1          | 3          | 16690.2803 | 0.0004  | 0.005 |
| 4    | 0         | 4         | 3     | 0          | 3          | 16822.2801 | -0.0005 | 0.005 |

**Table S9.** Experimental rotational transitions (obs) for the axial  $^{13}\text{C}(3)$  species of fluorocyclohexane, along with observed minus calculated values (o-c) and transition uncertainties (unc, all values in MHz).

| $J'$ | $K_{-l}'$ | $K_{+l}'$ | $J''$ | $K_{-l}''$ | $K_{+l}''$ | obs        | o-c     | unc   |
|------|-----------|-----------|-------|------------|------------|------------|---------|-------|
| 2    | 0         | 2         | 1     | 0          | 1          | 8905.9118  | 0.0026  | 0.005 |
| 3    | 1         | 3         | 2     | 1          | 2          | 12616.0384 | 0.0003  | 0.005 |
| 2    | 2         | 0         | 1     | 1          | 0          | 12775.0309 | 0.0001  | 0.005 |
| 3    | 0         | 3         | 2     | 0          | 2          | 12910.3267 | -0.0020 | 0.005 |
| 3    | 1         | 2         | 2     | 1          | 1          | 14511.1120 | -0.0006 | 0.005 |
| 4    | 1         | 4         | 3     | 1          | 3          | 16640.5055 | 0.0004  | 0.005 |
| 4    | 0         | 4         | 3     | 0          | 3          | 16777.1551 | 0.0000  | 0.005 |

**Table S10.** Experimental rotational transitions (obs) for the axial  $^{13}\text{C}(4)$  species of fluorocyclohexane, along with observed minus calculated values (o-c) and transition uncertainties (unc, all values in MHz).

| $J'$ | $K_{-l}'$ | $K_{+l}'$ | $J''$ | $K_{-l}''$ | $K_{+l}''$ | obs        | o-c     | unc   |
|------|-----------|-----------|-------|------------|------------|------------|---------|-------|
| 2    | 0         | 2         | 1     | 0          | 1          | 8861.5551  | 0.0008  | 0.005 |
| 3    | 1         | 3         | 2     | 1          | 2          | 12559.1457 | -0.0010 | 0.005 |
| 3    | 0         | 3         | 2     | 0          | 2          | 12875.9875 | -0.0018 | 0.005 |
| 3    | 1         | 2         | 2     | 1          | 1          | 14393.6799 | 0.0001  | 0.005 |
| 4    | 1         | 4         | 3     | 1          | 3          | 16578.6833 | 0.0003  | 0.005 |
| 4    | 0         | 4         | 3     | 0          | 3          | 16738.5748 | 0.0013  | 0.005 |

**Table S11.** Born-Oppenheimer equilibrium structure,  $r_e^{\text{BO}}$ , of cyclohexanone (distances in Å and angles in degree).

| Parameter | Value <sup>a</sup> | Parameter | Value <sup>a</sup> |
|-----------|--------------------|-----------|--------------------|
| C1C2      | 1.5124             | C2C3Hq    | 109.66             |
| C2C3      | 1.5332             | C2C3Ha    | 109.04             |
| C3C4      | 1.5256             | C3C4Hq    | 110.11             |
| C1O       | 1.2126             | C3C4Ha    | 109.35             |
| C2Hq      | 1.0877             | HqC2Ha    | 108.38             |
| C2Ha      | 1.0944             | HqC3Ha    | 106.92             |
| C3Hq      | 1.0900             | HaC4Hq    | 106.95             |
| C3Ha      | 1.0931             |           |                    |
| C4Hq      | 1.0905             | C1C2C3C4  | 53.46              |
| C4Ha      | 1.0942             | C2C3C4C5  | -57.37             |
|           |                    | C6C1C2C3  | -51.63             |
| C1C2C3    | 110.80             | OC1C2C3   | 127.19             |
| C2C3C4    | 111.18             | OC1C2Hq   | 3.43               |
| C3C4C5    | 110.89             | OC1C2Ha   | -113.79            |
| C2C1C6    | 114.98             | C1C2C3Hq  | 176.24             |
| C2C1O     | 122.50             | C1C2C3Ha  | -67.00             |
| C1C2Hq    | 108.69             | C2C3C4Hq  | -179.48            |
| C1C2Ha    | 107.69             | C2C3C4Ha  | 63.28              |

<sup>a</sup>Estimated according to the equation:  $r_e^{\text{BO}} = r_e[\text{CCSD(T)/cc-pVTZ}] + r_e[\text{MP2/cc-pVQZ}] - r_e[\text{MP2/cc-pVTZ}] + r_e[\text{MP2\_AE/cc-pwCVQZ}] - r_e[\text{MP2/cc-pwCVQZ}]$

**Table S12.** Ab initio structures of cyclohexanone (distances in Å and angles in degree).

| Method    | CCSD(T)_FC | MP2_FC   | MP2_FC   | MP2_AE    | MP2_FC    | $r_e^{\text{BO}}$ |
|-----------|------------|----------|----------|-----------|-----------|-------------------|
| Basis set | cc-pVTZ    | cc-pVQZ  | cc-pVTZ  | cc-pwCVQZ | cc-pwCVQZ |                   |
| C4Ha      | 1.0968     | 1.0928   | 1.0938   | 1.0911    | 1.0928    | 1.0942            |
| C1C4      | 2.9257     | 2.9043   | 2.9083   | 2.8973    | 2.9036    | 2.9155            |
| C1C2      | 1.5186     | 1.5087   | 1.5113   | 1.5046    | 1.5083    | 1.5124            |
| C2C3      | 1.5390     | 1.5316   | 1.5337   | 1.5275    | 1.5312    | 1.5332            |
| C1O       | 1.2169     | 1.2167   | 1.2188   | 1.2141    | 1.2163    | 1.2126            |
| C4Hq      | 1.0931     | 1.0895   | 1.0905   | 1.0878    | 1.0895    | 1.0905            |
| C2Hq      | 1.0901     | 1.0869   | 1.0878   | 1.0852    | 1.0868    | 1.0877            |
| C2Ha      | 1.0970     | 1.0929   | 1.0938   | 1.0912    | 1.0929    | 1.0944            |
| C3Hq      | 1.0926     | 1.0891   | 1.0901   | 1.0874    | 1.0890    | 1.0900            |
| C3Ha      | 1.0958     | 1.0918   | 1.0929   | 1.0901    | 1.0918    | 1.0931            |
| C1C4Ha    | 99.945     | 100.166  | 100.203  | 100.185   | 100.165   | 99.927            |
| C4C1C2    | 59.924     | 60.069   | 60.058   | 60.059    | 60.066    | 59.929            |
| C1C2C3    | 110.722    | 110.243  | 110.203  | 110.291   | 110.251   | 110.802           |
| C4C1O     | 157.504    | 155.937  | 155.727  | 156.064   | 155.970   | 157.808           |
| HqC4Ha    | 106.991    | 106.952  | 106.955  | 106.910   | 106.948   | 106.950           |
| C1C2Hq    | 108.642    | 108.800  | 108.742  | 108.791   | 108.801   | 108.691           |
| C1C2Ha    | 107.810    | 108.038  | 108.149  | 108.017   | 108.028   | 107.688           |
| C2C3Hq    | 109.700    | 109.685  | 109.740  | 109.696   | 109.684   | 109.657           |
| C2C3Ha    | 109.027    | 109.021  | 109.010  | 109.031   | 109.025   | 109.044           |
| HaC4C1C2  | -76.868    | -76.330  | -76.208  | -76.373   | -76.338   | -77.024           |
| C4C1C2C3  | -27.023    | -27.273  | -27.335  | -27.245   | -27.271   | -26.936           |
| C4C1C2Hq  | -150.661   | -150.761 | -150.730 | -150.775  | -150.770  | -150.698          |
| C4C1C2Ha  | 92.024     | 91.556   | 91.549   | 91.619    | 91.560    | 92.090            |
| C1C2C3Hq  | 176.374    | 177.071  | 177.175  | 177.036   | 177.063   | 176.243           |
| C1C2C3Ha  | -66.778    | -66.155  | -66.000  | -66.238   | -66.170   | -67.001           |

**Table S13.** Ab initio structures of equatorial fluorocyclohexane (distances in Å and angles in degree).

| Method<br>Basis set | CCSD(T)_AE<br>cc-pwCVTZ | MP2_AE<br>cc-pwCVQZ | MP2_AE<br>cc-pwCVTZ | $r_e^{\text{BO}^a}$ |
|---------------------|-------------------------|---------------------|---------------------|---------------------|
| C1Fq                | 1.3926                  | 1.3943              | 1.3924              | 1.3945              |
| C2Ha                | 1.0938                  | 1.0899              | 1.0907              | 1.0930              |
| C1Ha                | 1.0948                  | 1.0913              | 1.0922              | 1.0939              |
| C1C4                | 2.9263                  | 2.9088              | 2.9132              | 2.9218              |
| C3C4                | 1.5279                  | 1.5197              | 1.5215              | 1.5262              |
| C2C3                | 1.5296                  | 1.5217              | 1.5230              | 1.5282              |
| C4Hq                | 1.0915                  | 1.0879              | 1.0887              | 1.0907              |
| C4Ha                | 1.0947                  | 1.0908              | 1.0916              | 1.0939              |
| C3Ha                | 1.0950                  | 1.0910              | 1.0918              | 1.0941              |
| C3Hq                | 1.0909                  | 1.0873              | 1.0881              | 1.0901              |
| C2Hq                | 1.0908                  | 1.0872              | 1.0880              | 1.0900              |
| FC1C4               | 150.805                 | 151.005             | 151.007             | 150.804             |
| C4C1Ha              | 102.487                 | 102.516             | 102.312             | 102.691             |
| C1C4C3              | 58.639                  | 58.589              | 58.588              | 58.640              |
| C2C3C4              | 111.018                 | 110.926             | 110.923             | 111.021             |
| C1C4Hq              | 150.962                 | 151.130             | 151.118             | 150.974             |
| C1C4Ha              | 102.062                 | 101.922             | 101.927             | 102.058             |
| C4C3Ha              | 109.143                 | 109.160             | 109.141             | 109.161             |
| C4C3Hq              | 110.588                 | 110.684             | 110.667             | 110.605             |
| C3C2Hq              | 111.187                 | 111.260             | 111.248             | 111.198             |
| C3C2Ha              | 109.956                 | 109.970             | 109.972             | 109.954             |
| FC1C4C3             | 105.214                 | 105.332             | 105.329             | 105.217             |
| C2C3C4C1            | -28.105                 | -28.292             | -28.263             | -28.135             |
| C1C4C3Ha            | 92.491                  | 92.303              | 92.321              | 92.472              |
| C1C4C3Hq            | -150.383                | -150.574            | -150.577            | -150.380            |
| C4C3C2Hq            | 177.744                 | 178.072             | 178.089             | 177.727             |
| C4C3C2Ha            | -63.243                 | -62.807             | -62.858             | -63.192             |

<sup>a</sup>Estimated according to Eq. 1 (see text).

**Table S14.** Ab initio structures of axial fluorocyclohexane (distances in Å and angles in degree).

| Method    | CCSD(T)_AE | MP2_AE    | MP2_AE    | $r_e^{\text{BOa}}$ |
|-----------|------------|-----------|-----------|--------------------|
| Basis set | cc-pwCVTZ  | cc-pwCVQZ | cc-pwCVTZ |                    |
| C1Fa      | 1.3996     | 1.4004    | 1.3987    | 1.4013             |
| C1Hq      | 1.0916     | 1.0884    | 1.0892    | 1.0908             |
| C2Ha      | 1.0944     | 1.0906    | 1.0913    | 1.0937             |
| C2Hq      | 1.0910     | 1.0875    | 1.0883    | 1.0902             |
| C1C4      | 2.9378     | 2.9226    | 2.9249    | 2.9355             |
| C3C4      | 1.5279     | 1.5197    | 1.5214    | 1.5261             |
| C2C3      | 1.5282     | 1.5197    | 1.5214    | 1.5265             |
| C3Ha      | 1.0927     | 1.0889    | 1.0896    | 1.0919             |
| C3Hq      | 1.0912     | 1.0876    | 1.0884    | 1.0905             |
| C4Ha      | 1.0957     | 1.0918    | 1.0925    | 1.0949             |
| C4Hq      | 1.0915     | 1.0879    | 1.0887    | 1.0907             |
| FC1C4     | 102.305    | 102.591   | 102.288   | 102.608            |
| C4C1Ha    | 151.350    | 151.301   | 151.406   | 151.246            |
| C1C4C3    | 58.994     | 58.982    | 58.949    | 59.026             |
| C2C3C4    | 110.966    | 110.865   | 110.867   | 110.964            |
| C1C4Ha    | 100.716    | 100.358   | 100.540   | 100.534            |
| C1C4Hq    | 152.406    | 152.773   | 152.600   | 152.579            |
| C4C3Ha    | 109.290    | 109.280   | 109.292   | 109.279            |
| C4C3Hq    | 110.568    | 110.673   | 110.651   | 110.590            |
| C3C2Hq    | 111.039    | 111.181   | 111.114   | 111.107            |
| C3C2Ha    | 109.878    | 109.863   | 109.901   | 109.839            |
| FC1C4C3   | -73.851    | -73.591   | -73.707   | -73.734            |
| C2C3C4C1  | -27.273    | -27.335   | -27.426   | -27.183            |
| C1C4C3Ha  | 92.956     | 92.924    | 92.777    | 93.103             |
| C1C4C3Hq  | -149.390   | -149.459  | -149.593  | -149.256           |
| C4C3C2Hq  | 176.580    | 176.944   | 176.943   | 176.581            |
| C4C3C2Ha  | -64.772    | -64.435   | -64.423   | -64.784            |

<sup>a</sup>Estimated according to Eq. 1 (see text).

**Table S15.** Values for dihedral angles (in degree) of selected molecules.

| molecule          | angle     | $\tau_e$ | MP2     | B3LYP    | Ref. for |
|-------------------|-----------|----------|---------|----------|----------|
|                   |           |          | cc-pVTZ | 6-311+G  | $\tau_e$ |
| propane           | HaCCC     | 59.66    | 59.63   | 59.81    | a        |
| propene           | HaCCC     | 120.57   | 120.58  | 120.8192 | b        |
| propionitrile     | HaCCC     | 60.06    | 60.16   | 60.18    | c        |
| methyl formate    | HaCOC     | 60.26    | 60.31   | 60.36    | d        |
| acetaldehyde      | HaCCO     | 121.49   | 121.52  | 121.80   | a        |
| dimethylsulfide   | HaCSC     | 61.06    | 61.09   | 61.30    | e        |
| cyclohexane       | HaxCCHax  | 175.36   | 175.84  | 173.20   | f        |
|                   | HaxCCHeq  | 58.29    | 58.71   | 56.64    |          |
|                   | HeqCCC    | 178.51   | 178.86  | 177.28   |          |
|                   | HaxCCC    | 64.42    | 64.01   | 66.16    |          |
|                   | CCCC      | 55.80    | 56.14   | 54.48    |          |
|                   | CSCHII    | -58.43   | -58.39  | -58.39   | g        |
| dimethylsulfoxide | CSCHIII   | 63.47    | 63.76   | 63.76    |          |
|                   | CSCHI     | -177.11  | -176.76 | -177.25  |          |
|                   | C3C4C5C6  | 53.48    | 53.78   | 52.35    | f        |
| piperidine        | HqC4C3Hx  | -56.85   | -57.36  | -55.40   |          |
|                   | HqC4C3Hq  | 61.90    | 61.53   | 62.79    |          |
|                   | HxC4C3C2  | 66.34    | 65.95   | 67.91    |          |
|                   | HqC4C3C2  | -176.36  | -176.70 | -175.26  |          |
|                   | HxC4C3Hx  | -174.15  | -174.71 | -172.23  |          |
|                   | HxC4C3Hq  | -55.41   | -55.82  | -54.03   |          |
|                   | HxC3C4C5  | 66.02    | 65.56   | 67.51    |          |
|                   | HqC3C4C5  | -175.23  | -175.55 | -174.30  |          |
|                   | C4C3C2N   | 57.46    | 57.97   | 55.94    |          |
|                   | HxC2C3C4  | -65.01   | -64.62  | -67.13   |          |
|                   | HqC2C3C4  | 177.02   | 177.41  | 175.53   |          |
|                   | HxC3C2N   | -62.71   | -62.10  | -64.52   |          |
|                   | HqC3C2N   | 179.97   | 179.84  | 178.32   |          |
|                   | HxC3C2Hx  | 174.82   | 175.31  | 172.41   |          |
|                   | HxC3C2Hq  | 56.84    | 57.34   | 55.07    |          |
|                   | HqC3C2Hx  | 56.91    | 57.57   | 55.25    |          |
|                   | HqC3C2Hq  | -60.80   | -60.40  | -62.09   |          |
|                   | C3C2NC6   | -63.01   | -63.68  | -61.54   |          |
|                   | HNC2C3    | 175.47   | 175.54  | 174.80   |          |
|                   | HxC2NH    | -64.00   | -63.93  | -64.17   |          |
|                   | HqC2NH    | 54.75    | 54.95   | 54.10    |          |
|                   | HxC2NC6   | 57.53    | 56.85   | 59.49    |          |
|                   | HqC2NC6   | 176.27   | 175.73  | 177.77   |          |
| proline           | C6C2N1H9  | -118.36  | -119.91 | -113.08  | h        |
|                   | N1C2C6O8  | 2.37     | 2.29    | 0.71     |          |
|                   | C2C6O8H11 | -0.76    | -0.16   | -0.75    |          |
|                   | N1C2C6O7  | -177.59  | -177.27 | -179.53  |          |



|             |             |         |         |         |   |
|-------------|-------------|---------|---------|---------|---|
|             | H9N1C2H10   | -0.1    | -1.38   | 4.7     |   |
|             | H9N1C2C3    | 122.02  | 121.02  | 125.77  |   |
|             | N1C2C3H12   | -90.73  | -89.06  | -94.32  |   |
|             | N1C2C3H13   | 148.97  | 150.21  | 146.08  |   |
|             | N1C2C3C4    | 25.96   | 27.46   | 22.96   |   |
|             | C2C3C4H14   | -161.25 | -162.66 | -158.44 |   |
|             | C2C3C4H14   | 77      | 75.41   | 80.59   |   |
|             | C2C3C4C5    | -39.93  | -41.43  | -37.02  |   |
|             | C3C4C5H16   | -79.69  | -78.72  | -81.89  |   |
|             | C3C4C5H17   | 158.91  | 159.78  | 157.16  |   |
| deoxyribose | O6C1C2C3    | -51.26  | -52.79  | -50.33  | i |
|             | O6C1C2H10   | -174.10 | -175.42 | -173.19 |   |
|             | O6C1C2H19   | 68.62   | 66.99   | 69.99   |   |
|             | O16C1C2C3   | 71.38   | 69.98   | 72.87   |   |
|             | O16C1C2H10  | -51.46  | -52.65  | -49.98  |   |
|             | O16C1C2H19  | -168.74 | -170.23 | -166.80 |   |
|             | H18C1C2C3   | -166.92 | -168.28 | -165.77 |   |
|             | H18C1C2C10  | 70.23   | 69.09   | 71.38   |   |
|             | H18C1C2H19  | -47.05  | -48.49  | -45.44  |   |
|             | C2C1O6C5    | 58.45   | 59.23   | 56.83   |   |
|             | O16C1O6C5   | -62.07  | -61.15  | -64.49  |   |
|             | H18C1O6C5   | 178.46  | 179.31  | 176.57  |   |
|             | C2C1O16H17  | 175.96  | 175.91  | 175.38  |   |
|             | O6C1O16H17  | -61.33  | -61.32  | -61.27  |   |
|             | H18C1O16H17 | 54.01   | 53.89   | 53.67   |   |
|             | C1C2C3C4    | 49.05   | 50.20   | 48.83   |   |
|             | C1C2C3O7    | 171.97  | 172.64  | 172.59  |   |
|             | C1C2C3H11   | -69.64  | -69.39  | -70.23  |   |
|             | H10C2C3C4   | 171.73  | 172.60  | 171.51  |   |
|             | H10C2C3O7   | -65.34  | -64.96  | -64.74  |   |
|             | H10C2C3H11  | 52.36   | 53.00   | 52.44   |   |
|             | H19C2C3C4   | -70.53  | -69.38  | -70.99  |   |
|             | H19C2C3O7   | 52.40   | 53.06   | 52.76   |   |
|             | H19C2C3H11  | 170.10  | 171.02  | 169.94  |   |
|             | C2C3C4C5    | -52.77  | -53.71  | -52.23  |   |
|             | C2C3C4O8    | 69.31   | 68.32   | 71.16   |   |
|             | C2C3C4H12   | -174.18 | -175.37 | -173.02 |   |
|             | O7C2C4C5    | -176.03 | -176.62 | -176.28 |   |
|             | O7C3C4O8    | -53.95  | -54.59  | -52.88  |   |
|             | O7C3C4H12   | 62.56   | 61.72   | 62.94   |   |
|             | H11C3C4C5   | 67.25   | 66.38   | 67.52   |   |
|             | H11C3C4O8   | -170.67 | -171.59 | -169.08 |   |
|             | H11C3C4H12  | -54.16  | -55.28  | -53.27  |   |
|             | C2C3O7H9    | -79.40  | -78.36  | -80.63  |   |
|             | C4C3O7H9    | 43.25   | 43.52   | 42.73   |   |
|             | H11C3O7H9   | 161.13  | 161.88  | 160.23  |   |
|             | C3C4C5O6    | 59.36   | 59.88   | 57.84   |   |
|             | C3C4C5H13   | 176.03  | 176.28  | 174.87  |   |
|             | C3C4C5H14   | -62.75  | -62.35  | -64.55  |   |
|             | O8C4C5O6    | -62.01  | -61.34  | -64.74  |   |

|            |         |         |         |
|------------|---------|---------|---------|
| O8C4C5H13  | 54.65   | 55.07   | 52.29   |
| O8C4C5H14  | 175.88  | 176.43  | 172.87  |
| H12C4C5O6  | -179.78 | -179.09 | -178.21 |
| H12C4C5H13 | -63.12  | -62.68  | -64.76  |
| H12C4C5H14 | 58.11   | 58.68   | 55.82   |
| C3C4O8H15  | -85.59  | -86.16  | -86.07  |
| C5C4O8H15  | 35.77   | 35.32   | 36.39   |
| H12C4O8H15 | 155.96  | 155.58  | 155.94  |
| C4C5O6C1   | -62.97  | -62.90  | -61.12  |
| H13C5O6C1  | 177.36  | 177.61  | 178.83  |
| H14C5O6C1  | 59.00   | 59.24   | 61.10   |

<sup>a</sup> CCSD(T)\_AE/cc-pwCVQZ value. <sup>b</sup> J. Demaison and H. D. Rudolph, *J. Mol. Spectrosc.*, 2008, **248**, 66-76. <sup>c</sup> J. Demaison, L. Margulès, H. Mäder, M. Sheng and H. D. Rudolph, *J. Mol. Spectrosc.*, 2008, **252**, 169-175. <sup>d</sup> J. Demaison, L. Margulès, I. Kleiner and A. G. Császár, *J. Mol. Spectrosc.*, 2010, **259**, 70-79. <sup>e</sup> J. Demaison, L. Margulès and H. D. Rudolph, *J. Mol. Struct.*, 2010, **978**, 229-233. <sup>f</sup> J. Demaison, N. C. Craig, P. Groner, P. Écija, E. J. Cocinero, A. Lesarri and H. D. Rudolph, *J. Phys. Chem. A* 2015, **119**, 1486-1493. <sup>g</sup> N. Vogt, J. Demaison and H. D. Rudolph, *J. Mol. Spectrosc.*, 2014, **297**, 11-15. <sup>h</sup> N. Vogt, J. Demaison, S. V. Krasnoshchikov, N. F. Stepanov and H. D. Rudolph, *Mol. Phys.*, 2017, **115**, 942-951. <sup>i</sup> N. Vogt, J. Demaison, E. J. Cocinero, P. Écija, A. Lesarri, H. D. Rudolph and J. Vogt, *Phys. Chem. Chem. Phys.*, 2016, **18**, 15555-15563.

**Table S16.** Calculation of the predicate of the torsional angle for both conformers of fluorocyclohexane and for cyclohexanone (in degree).

|                              | MP2<br>cc-pVTZ | B3LYP<br>6-311+ <sup>a</sup> | $\tau_e$ <sup>b</sup> | predicate | $\tau_e - \text{pred.}$ |
|------------------------------|----------------|------------------------------|-----------------------|-----------|-------------------------|
| Equatorial fluorocyclohexane |                |                              |                       |           |                         |
| C1C2C3C4                     | 56.36          | 54.76                        | 55.97                 | 55.89     | 0.08                    |
| FqC1C2C3                     | -178.55        | -177.38                      | -178.18               | -178.20   | 0.02                    |
| FqC1C2Hq                     | 58.71          | 59.88                        | 59.11                 | 59.06     | 0.05                    |
| FqC1C2Ha                     | -58.33         | -56.78                       | -57.93                | -57.87    | -0.06                   |
| C1C2C3Hq                     | 179.07         | 177.48                       | 178.64                | 178.60    | 0.04                    |
| C1C2C3Ha                     | -64.05         | -66.24                       | -64.53                | -64.70    | 0.17                    |
| C2C3C4Hq                     | -178.51        | -176.9                       | -178.2                | -178.03   | -0.17                   |
| C2C3C4Ha                     | 64.18          | 66.39                        | 64.58                 | 64.83     | -0.25                   |
| Axial fluorocyclohexane      |                |                              |                       |           |                         |
| C1C2C3C4                     | 55.2           | 53.25                        | 54.66                 | 54.62     | 0.04                    |
| C3C2C1Hq                     | -178.14        | -176.3                       | -177.57               | -177.59   | 0.02                    |
| HqC1C2Hq                     | 58.88          | 60.31                        | 59.31                 | 59.30     | 0.01                    |
| HqC1C2Ha                     | -57.44         | -55.25                       | -56.89                | -56.79    | -0.10                   |
| C1C2C3Hq                     | 177.79         | 175.92                       | 177.2                 | 177.24    | -0.04                   |
| C1C2C3Ha                     | -65.13         | -67.59                       | -65.76                | -65.86    | 0.10                    |
| C2C3C4Hq                     | -179.36        | -177.64                      | -179.07               | -178.85   | -0.22                   |
| C2C3C4Ha                     | 63.36          | 65.68                        | 63.73                 | 64.05     | -0.32                   |
| Cyclohexanone                |                |                              |                       |           |                         |
| C1C2C3C4                     | 54.38          | 51.62                        | 53.46                 | 53.56     | -0.10                   |
| C2C3C4C5                     | -57.56         | -56.05                       | -57.37                | -57.11    | -0.26                   |
| C6C1C2C3                     | -53.51         | -48.68                       | -51.63                | -52.08    | 0.45                    |
| OC1C2C3                      | 124.37         | 131.22                       | 127.19                | 126.40    | 0.79                    |
| OC1C2Hq                      | 0.97           | 6.88                         | 3.43                  | 2.72      | 0.71                    |
| OC1C2Ha                      | -116.75        | -109.29                      | -113.79               | -114.54   | 0.75                    |
| C1C2C3Hq                     | 177.17         | 174.55                       | 176.24                | 176.40    | -0.16                   |
| C1C2C3Ha                     | -66.00         | -69.29                       | -67                   | -66.98    | -0.02                   |
| C2C3C4Hq                     | -179.71        | -178.22                      | -179.48               | -179.27   | -0.21                   |
| C2C3C4Ha                     | 63.03          | 65.06                        | 63.28                 | 63.63     | -0.35                   |
| MAD <sup>c</sup>             |                |                              |                       |           | 0.10                    |
| $\sigma$ <sup>d</sup>        |                |                              |                       |           | 0.31                    |

<sup>a</sup> 6-311+G(3df,2pd). <sup>b</sup> See Tables 3, 4, and 5. <sup>c</sup> Median absolute deviation. <sup>d</sup> Standard deviation.

**Table S17.** Rovibrational corrections  $X_e - X_0$ , semiexperimental equilibrium rotational constants  $X_e^{\text{SE}}$ , residuals of the fit (all values in MHz) and leverage values  $h_{ii}$  for equatorial fluorocyclohexane.

| Isotopologue     | Axis     | $X_e - X_0$ | $X_e^{\text{SE}}$ | exp - calc | $h_{ii}$ |
|------------------|----------|-------------|-------------------|------------|----------|
| Parent           | <i>a</i> | 47.413      | 4360.784          | -0.001     | 0.62     |
|                  | <i>b</i> | 19.063      | 2207.866          | 0.000      | 0.67     |
|                  | <i>c</i> | 14.988      | 1606.609          | 0.006      | 0.35     |
| <sup>13</sup> C1 | <i>a</i> | 47.162      | 4356.759          | -0.001     | 0.89     |
|                  | <i>b</i> | 18.869      | 2198.585          | 0.001      | 0.83     |
|                  | <i>c</i> | 14.847      | 1602.225          | -0.001     | 0.44     |
| <sup>13</sup> C2 | <i>a</i> | 46.480      | 4301.633          | -0.002     | 0.95     |
|                  | <i>b</i> | 18.955      | 2206.918          | -0.001     | 0.71     |
|                  | <i>c</i> | 14.839      | 1598.334          | -0.001     | 0.49     |
| <sup>13</sup> C3 | <i>a</i> | 46.500      | 4301.581          | 0.001      | 0.94     |
|                  | <i>b</i> | 18.819      | 2192.997          | 0.002      | 0.83     |
|                  | <i>c</i> | 14.755      | 1591.131          | -0.006     | 0.47     |
| <sup>13</sup> C4 | <i>a</i> | 47.189      | 4357.770          | 0.002      | 0.88     |
|                  | <i>b</i> | 18.699      | 2172.085          | -0.002     | 0.84     |
|                  | <i>c</i> | 14.743      | 1587.977          | 0.003      | 0.44     |

<sup>a</sup>  $X = A, B, C$

**Table S18.** Rovibrational corrections  $X_e - X_0$ , semiexperimental equilibrium rotational constants  $X_e^{\text{SE}}$ , residuals of the fit (all values in MHz) and leverage values  $h_{ii}$  for axial fluorocyclohexane.

| Isotopologue     | Axis     | $X_e - X_0$ | $X_e^{\text{SE}}$ | exp - calc | $h_{ii}$ |
|------------------|----------|-------------|-------------------|------------|----------|
| Parent           | <i>a</i> | 31.318      | 3594.287          | 0.029      | 0.24     |
|                  | <i>b</i> | 30.265      | 2658.890          | -0.025     | 0.43     |
|                  | <i>c</i> | 24.505      | 2005.387          | 0.005      | 0.31     |
| $^{13}\text{C}1$ | <i>a</i> | 30.948      | 3588.092          | -0.063     | 0.38     |
|                  | <i>b</i> | 29.986      | 2639.733          | 0.007      | 0.74     |
|                  | <i>c</i> | 24.324      | 1996.345          | 0.014      | 0.42     |
| $^{13}\text{C}2$ | <i>a</i> | 30.641      | 3544.399          | -0.048     | 0.57     |
|                  | <i>b</i> | 30.097      | 2652.672          | 0.041      | 0.45     |
|                  | <i>c</i> | 24.255      | 1992.365          | 0.017      | 0.43     |
| $^{13}\text{C}3$ | <i>a</i> | 30.807      | 3553.010          | 0.014      | 0.56     |
|                  | <i>b</i> | 30.031      | 2644.616          | -0.026     | 0.45     |
|                  | <i>c</i> | 24.153      | 1985.884          | -0.020     | 0.47     |
| $^{13}\text{C}4$ | <i>a</i> | 31.176      | 3594.004          | 0.066      | 0.25     |
|                  | <i>b</i> | 29.671      | 2614.475          | -0.016     | 0.62     |
|                  | <i>c</i> | 24.074      | 1980.090          | -0.015     | 0.45     |

<sup>a</sup>  $X = A, B, C$

**Table S19.** Cartesian coordinates for the semiexperimental equilibrium structure of equatorial fluorocyclohexane (in Å).

|     | $a_e$        | $b_e$        | $c_e$        |
|-----|--------------|--------------|--------------|
| C1  | -0.92971(27) | 0            | 0.32898(37)  |
| C2  | -0.25583(69) | 1.25371(13)  | -0.18171(66) |
| C3  | 1.22310(19)  | 1.25710(11)  | 0.21498(41)  |
| C4  | 1.92679(14)  | 0            | -0.28680(51) |
| C5  | 1.22310(19)  | -1.25710(11) | 0.21498(41)  |
| C6  | -0.25583(69) | -1.25371(13) | -0.18171(66) |
| Fq  | -2.26104(56) | 0            | -0.07956(57) |
| H1a | -0.9403(28)  | 0            | 1.4231(14)   |
| H2q | -0.7732(30)  | 2.1293(17)   | 0.2085(35)   |
| H2a | -0.3544(61)  | 1.2709(25)   | -1.2706(13)  |
| H3q | 1.7090(28)   | 2.1497(17)   | -0.1770(31)  |
| H3a | 1.2999(47)   | 1.3024(25)   | 1.3060(12)   |
| H4q | 2.9704(16)   | 0            | 0.0295(29)   |
| H4a | 1.9236(27)   | 0            | -1.3809(14)  |
| H5q | 1.7090(28)   | -2.1497(17)  | -0.1770(31)  |
| H5a | 1.2999(47)   | -1.3024(25)  | 1.3060(12)   |
| H6q | -0.7732(30)  | -2.1293(17)  | 0.2085(35)   |
| H6a | -0.3544(61)  | -1.2709(25)  | -1.2706(13)  |

**Table S20.** Cartesian coordinates for the semiexperimental equilibrium structure of axial fluorocyclohexane (in Å).

|     | $a_e$        | $b_e$        | $c_e$        |
|-----|--------------|--------------|--------------|
| H1q | -1.8973(22)  | 0            | -1.2055(24)  |
| C1  | -1.07120(79) | 0            | -0.49310(99) |
| Fa  | -1.6563(10)  | 0            | 0.78274(90)  |
| C2  | -0.2443(12)  | 1.26071(57)  | -0.63367(62) |
| C6  | -0.2443(12)  | -1.26071(57) | -0.63367(62) |
| C3  | 0.95313(64)  | 1.25547(57)  | 0.3118(12)   |
| C5  | 0.95313(64)  | -1.25547(57) | 0.3118(12)   |
| C4  | 1.79931(55)  | 0            | 0.1138(17)   |
| H4q | 2.6428(37)   | 0            | 0.8050(53)   |
| H4a | 2.2154(42)   | 0            | -0.8990(34)  |
| H2q | -0.8825(30)  | 2.1264(21)   | -0.4556(43)  |
| H2a | 0.0964(65)   | 1.3179(30)   | -1.6715(25)  |
| H6q | -0.8825(30)  | -2.1264(21)  | -0.4556(43)  |
| H6a | 0.0964(65)   | -1.3179(30)  | -1.6715(25)  |
| H3q | 1.5536(27)   | 2.1509(21)   | 0.1499(43)   |
| H3a | 0.5887(68)   | 1.2911(30)   | 1.3407(31)   |
| H5q | 1.5536(27)   | -2.1509(21)  | 0.1499(43)   |
| H5a | 0.5887(68)   | -1.2911(30)  | 1.3407(31)   |

**Table S21.** Comparison of the  $r_s$  structure and the semiexperimental equilibrium structure,  $r_e^{SE}$ , for equatorial fluorocyclohexane.

Cartesian coordinates<sup>a</sup> (Å)

|    | $a_s$                                   | $a_e$      | $b_s$          | $b_e$     | $c_s$         | $c_e$      |
|----|-----------------------------------------|------------|----------------|-----------|---------------|------------|
| C1 | -0.927(2) <sup>b</sup> (4) <sup>c</sup> | -0.9297(3) | I <sup>d</sup> | 0         | 0.331(5)(10)  | 0.3290(4)  |
| C2 | -0.239(6)(14)                           | -0.2558(7) | 1.258(1)(3)    | 1.2537(1) | -0.178(8)(19) | -0.1817(7) |
| C3 | 1.224(1)(3)                             | 1.2231(2)  | 1.262(1)(3)    | 1.2571(1) | 0.212(7)(17)  | 0.2150(4)  |
| C4 | 1.934(1)(4)                             | 1.9268(1)  | I <sup>d</sup> | 0         | -0.289(5)(29) | -0.2868(5) |

Internal coordinates<sup>d</sup> (distances in Å and angles in degree)

|      | $r_s$    | $r_e^{SE}$ |          | $r_s$      | $r_e^{SE}$ |
|------|----------|------------|----------|------------|------------|
| C1C2 | 1.522(4) | 1.5122(4)  | C1C2C3   | 110.64(36) | 110.17(3)  |
| C2C3 | 1.514(7) | 1.5312(7)  | C2C3C4   | 111.18(29) | 111.01(2)  |
| C3C4 | 1.532(3) | 1.5255(3)  | C1C2C3C4 | 55.89(70)  | 55.99(5)   |

<sup>a</sup>See Table S19. <sup>b</sup>The uncertainties are given in parentheses. The first digit is calculated with Costain's rule,  $\delta z = 0.0015/|z|$ . <sup>c</sup>The second parentheses represent the uncertainty calculated taking into account the variation of the rovibrational correction upon isotopic substitution. <sup>d</sup>Imaginary coordinate.
